# Supplementary material
Source: publisher figshare collection journal article supplement (https://gsajournals.figshare.com/articles/dataset/_/7295477)
Supplement: Supplementary file 1 [file 1]

**Table S1**

To simplify the labeling of the many different cell lines throughout this manuscript, we designate them as follows:

| Cell line                                         | Code name             | Original name | Repeat number         | REF                              |                         |
|---------------------------------------------------|-----------------------|---------------|-----------------------|----------------------------------|-------------------------|
| XY WT hESCs                                       | WT-ES-1               | SZ-13         | normal range          | (AVITZOUR <i>et al.</i> 2014)    |                         |
|                                                   | WT-ES-2               | SZ-15         |                       |                                  |                         |
|                                                   | XX WT hESC            | WT-ES-3       |                       |                                  | HES-123                 |
|                                                   | XY WT hESC            | WT-ES-4       |                       |                                  | B-200                   |
|                                                   | XY WT hESC            | WT-ES-5       |                       |                                  | SZ-FX C15B <sup>1</sup> |
| hESC with unmethylated full expansion at the FMR1 | uFM-ES-1              | HEFX          | ~200-650              |                                  |                         |
|                                                   | uFM-ES-2 <sup>2</sup> | SZ-FX7        | ~200-300              |                                  |                         |
|                                                   | uFM-ES-3              | SZ-FX C12B    | ~202, 300             |                                  |                         |
|                                                   | uFM-ES-4              | SZ-FX1        |                       |                                  |                         |
| hESC with premutation expansion at the FMR1       | PM-ES-1               | SZ-FX4        | 160 <sup>3</sup>      |                                  |                         |
|                                                   | PM-ES-2               | SZ-FX14 C-11  | 107, 125 <sup>3</sup> |                                  |                         |
| hESC with an expansion at the C9orf72             | C9-ES-1               | SZ-ALS1       | 270                   | (COHEN-HADAD <i>et al.</i> 2016) |                         |
|                                                   | C9-ES-2               | SZ-ALS3       | 270                   |                                  |                         |

<sup>1</sup> This cell line was used only as a wild type (WT) control for the *C9orf72* locus

<sup>2</sup> A female cell line with skewed inactivation of the normal allele (AVITZOUR *et al.* 2014).

<sup>3</sup> Determined using Asuragen (Amplidex® PCR/CE *FMR1*).

<sup>4</sup> Roughly estimated by Southern blot analysis

**Table S2 (primers):**

| Method                                   | Reaction                                          | 5' Primer (sequence 5'-3')                | 3' Primer (sequence 5'-3')                    | Tm                      |    |
|------------------------------------------|---------------------------------------------------|-------------------------------------------|-----------------------------------------------|-------------------------|----|
| DRIP                                     | EGR1                                              | GAACGTTCAGCCTCGTTCTC                      | GGAAGGTGGAAGGAAACACA                          | 60                      |    |
|                                          | RPL13A                                            | AATGTGGCATTTCCTTCTCG                      | CCAATTCGGCCAAGACTCTA                          | 60                      |    |
|                                          | FMR1                                              | GAGGGCTTCAGGTCTCCTTT                      | CAGTTGCCATTGTGATTGG                           | 60                      |    |
|                                          | C9orf72                                           | GCCTCCCCTATTAAGGTTTCG                     | TCTCACGAGGCTAGCGAAAT                          | 60                      |    |
| Colony bisulfite footprinting analysis   | FMR1 5' R-loop boundary                           | GAGGGAAACAGCGTTGATCACGTG                  | TAACAACAACACCTCCATCACC*                       | 56                      |    |
|                                          | FMR1 3' R-loop boundary                           | GAAGTTTTTTTTGATTTTGAGAGG*                 | CCAATGCTAGACCGGAAAAGAG                        | 60                      |    |
|                                          | C9orf72 5' R-loop boundary                        | AGGAAAGAGAGGTGCGTCAA                      | CACACAACCTCTAAATCCAAAAC*                      | 55                      |    |
|                                          | C9orf72 3' R-loop boundary                        | GTTTTGTTGGGGGAAGTT*                       | GGTGCATGGCAACTGTTGAATAG                       | 55                      |    |
|                                          | FMR1 repeats sense with R-loops 1 <sup>‡</sup>    | GAGGGAAACAGCGTTGATCACGTG                  | CCTCTCAAATCAAAAAAAAACTCC*                     | 60                      |    |
|                                          | FMR1 repeats sense with R-loops 2                 | GGAACAGCGTTGATCACGTGACGTGGTTTC            |                                               | 60                      |    |
|                                          | FMR1 repeats (antisense and sense) 1 <sup>‡</sup> | GAGGGAAACAGCGTTGATCACGTG                  | CCTCTCGGAGTCGGAGAGGGGCTTC                     | 60                      |    |
|                                          | FMR1 repeats (antisense and sense) 2              | GGAACAGCGTTGATCACGTGACGTGGTTTC            |                                               | 61                      |    |
|                                          | C9orf72 repeats (antisense and sense)             | TCAGAGAAATGAGAGGGAAAGTAAA                 | GACCTGATAAAGATTAACCGAAGAA                     | 58                      |    |
|                                          | RPL13A                                            | GATTGGACATTCGGAAGAGG                      | GGATGTAAAGCTCCGCAAAA                          | 58                      |    |
| Next-seq bisulfite footprinting analysis | FMR1 repeats <sup>‡</sup>                         | GAGGGAAACAGCGTTGATCACGTG                  | CCTCTCGGAGTCGGAGAGGGGCTTC                     | 60                      |    |
|                                          |                                                   | Adapter-GGAACAGCGTTGATCACGTGACGTGGTTTC    | Adapter-CACCAGCTCCTCCATCTTCT                  | 61                      |    |
|                                          | C9orf72 repeats <sup>‡</sup>                      | TCAGAGAAATGAGAGGGAAAGTAAA                 | GACCTGATAAAGATTAACCGAAGAA                     | 58                      |    |
|                                          |                                                   | Adapter-TCAGAGAAATGAGAGGGAAAGTAAA         | Adapter-GACCTGATAAAGATTAACCGAAGAA             | 58                      |    |
|                                          | RPL13A <sup>‡</sup>                               | GATTGGACATTCGGAAGAGG                      | GGATGTAAAGCTCCGCAAAA                          | 58                      |    |
|                                          |                                                   | Adapter-TCGTCGGCAGCGTCAGATGTGTATAAGAGACAG | Adapter-GTCTCGTGGGCTCGGAGATGTGTATAAGAGACAGGGA | 58                      |    |
|                                          | SNP                                               | C9orf72                                   | GTTTTTCCCACCTCTCTCC                           | GGTGCATGGCAACTGTTGAATAG | 56 |

\* converted primers; <sup>‡</sup> hemi-nested reaction
