# Supplementary material
Source: publisher figshare collection journal article supplement (https://gsajournals.figshare.com/articles/dataset/_/7295477)
Supplement: Supplementary file 3 [file 1]

**Figure S2**

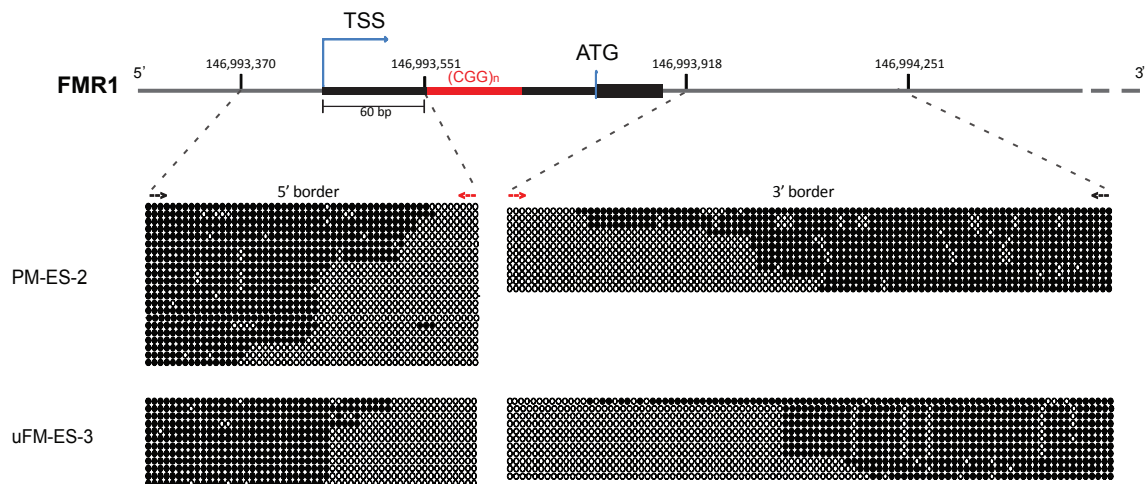

Figure S2. Mapping single strand DNA displacements on the non-template (G-rich) DNA of *FMR1* by bisulfite DNA footprinting. Bisulfite DNA sequencing data at the boundaries of the single strand DNA displacements in XY hESC with premutation (55 < CGGs < 200; PM-ES-2) and unmethylated full mutation (CGGs > 200 repeats; uFM-ES-3) alleles. Each row represents a single DNA molecule and each circle represents a single cytosine site. Black circles represent bisulfite unconverted Cs (indicating double strand DNA conformation) and white circles represent bisulfite converted C to T (indicating single strand DNA conformation).
